# Supplementary material
Source: PubMed Central journal article supplement (PMC3666636)
Supplement: mt201339x1.pdf [file mt201339x1.pdf]

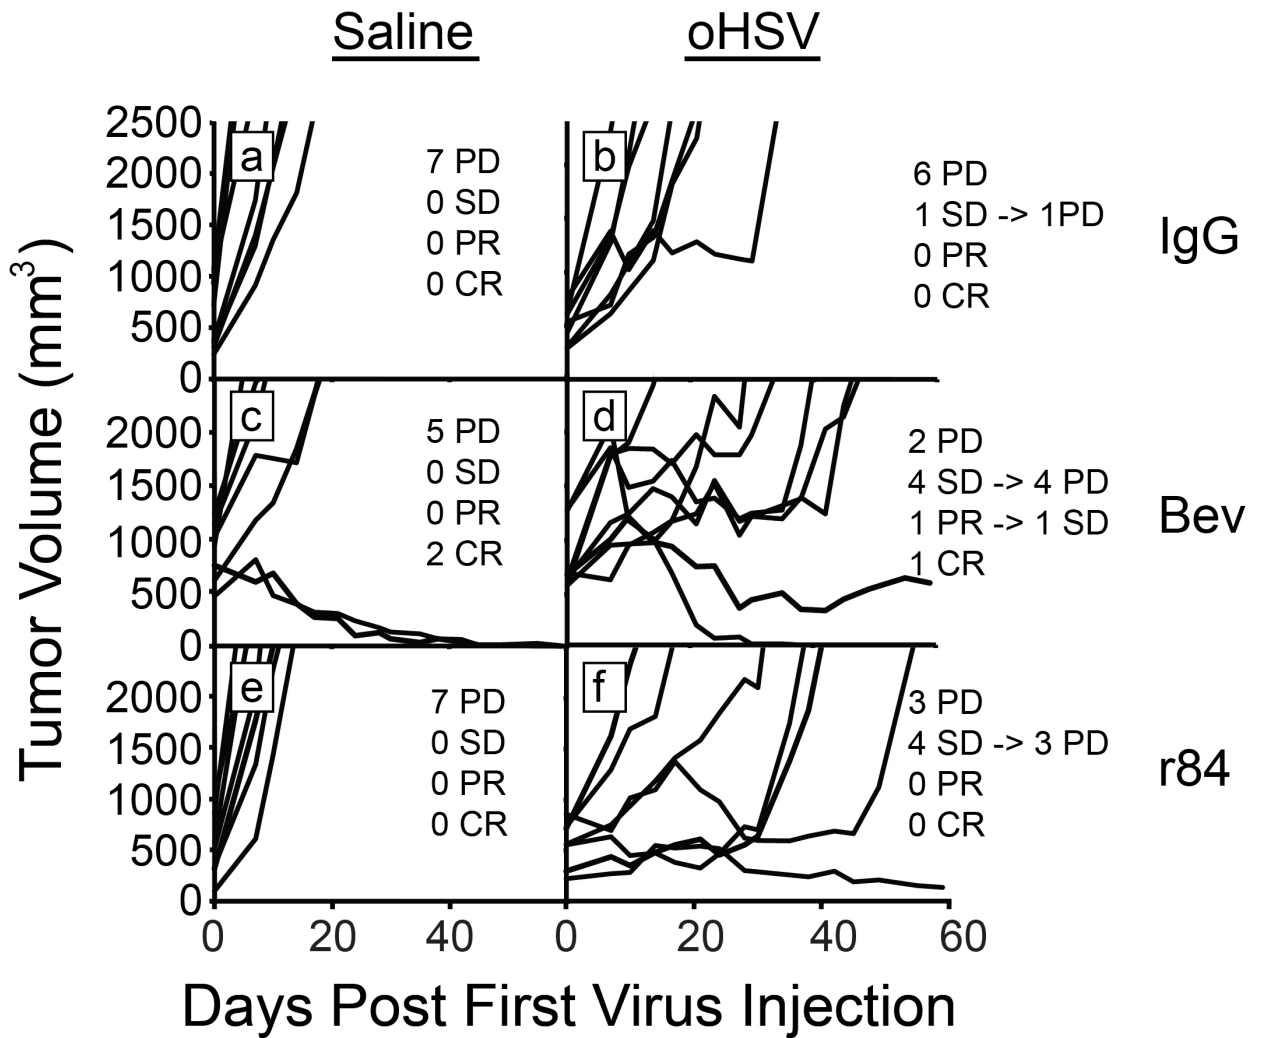

**Figure S1. *In vivo* efficacy of rRp450 combined with VEGF blockade.** Mice bearing A673 tumors received received two intratumoral injections of saline (control) or rRp450 at  $1 \times 10^7$  pfu on days 0 and 2 and the indicated antibody (IgG, control; Bev, bevacizumab; r84, which blocks mVEGF and hVEGF-VEGFR2 binding). Tumors were followed for growth and tallied by their best response (PD, progressive disease; SD, stable disease; PR, partial response; CR, complete response; n=7-8).
